# Supplementary material for: Validation and description of two new north-western Australian Rainbow skinks with multispecies coalescent methods and morphology
Source: PubMed Central journal article supplement (PMC5580384; doi:10.7717/peerj.3724), 2017-08-29
Supplement: peerj-05-3724-s008.pdf [file peerj-05-3724-s008.pdf]

**J  
o  
h  
n  
s  
t  
o  
n  
e  
i  
B**

**Triacantha A**

**J  
o  
h  
n  
s  
t  
o  
n  
e  
i  
A**

**T  
r  
i  
a  
c  
a  
n  
t  
h  
a  
B**

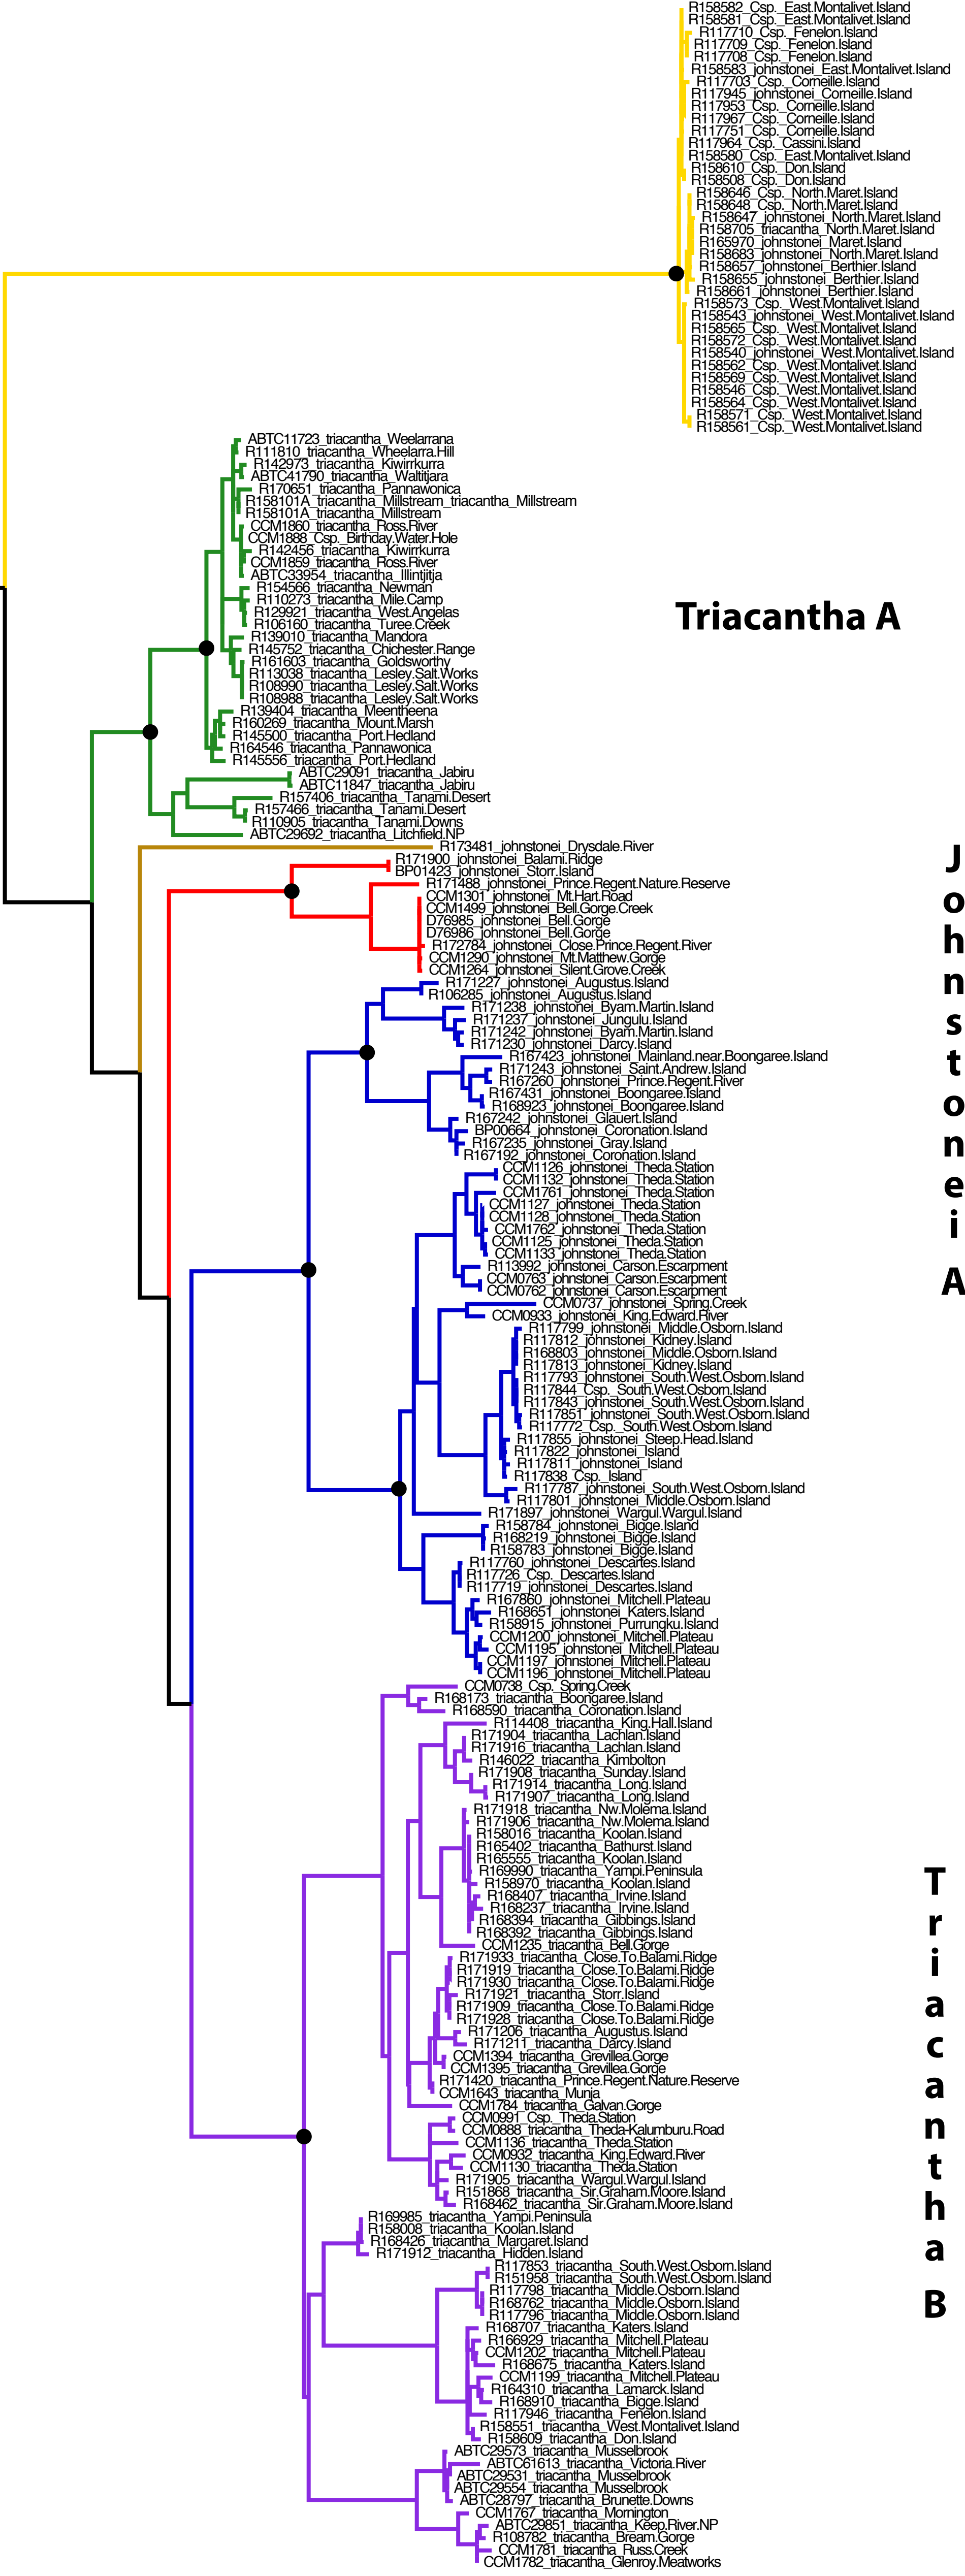

0.08

**Supplemental Figure S1** – mtDNA ND4 maximum likelihood phylogenetic tree of *Carlia triacantha* and *Carlia johnstonei*, from Afonso Silva et al. (2017), with specimens that were analysed by morphological analyses. Sample label includes tissue number, original ID and sampling location.
