# Supplementary material for: Validation and description of two new north-western Australian Rainbow skinks with multispecies coalescent methods and morphology
Source: PubMed Central journal article supplement (PMC5580384; doi:10.7717/peerj.3724), 2017-08-29
Supplement: peerj-05-3724-s011.pdf [file peerj-05-3724-s011.pdf]

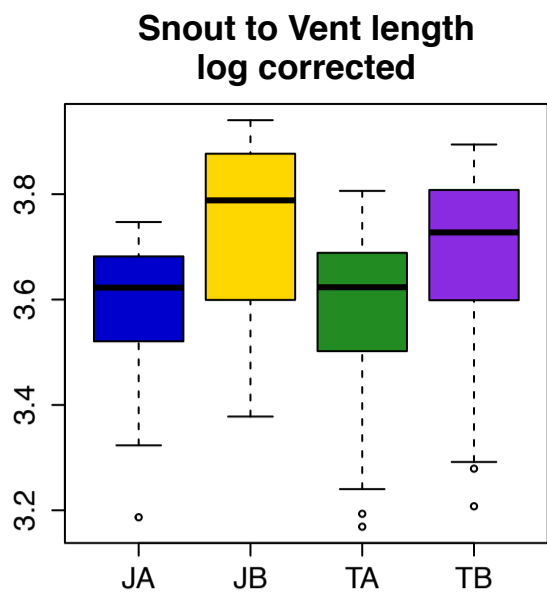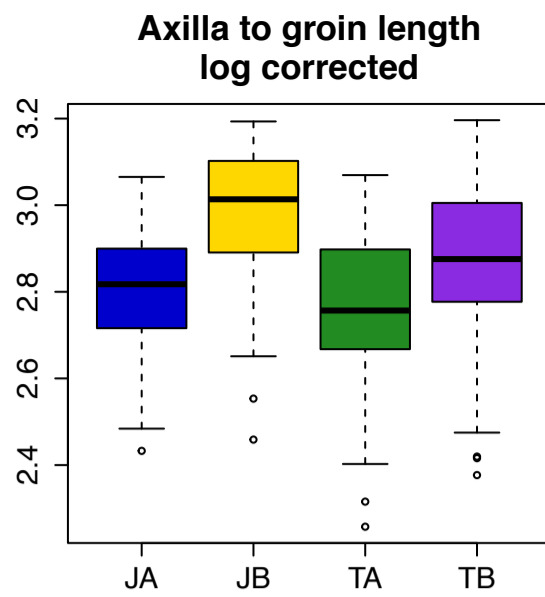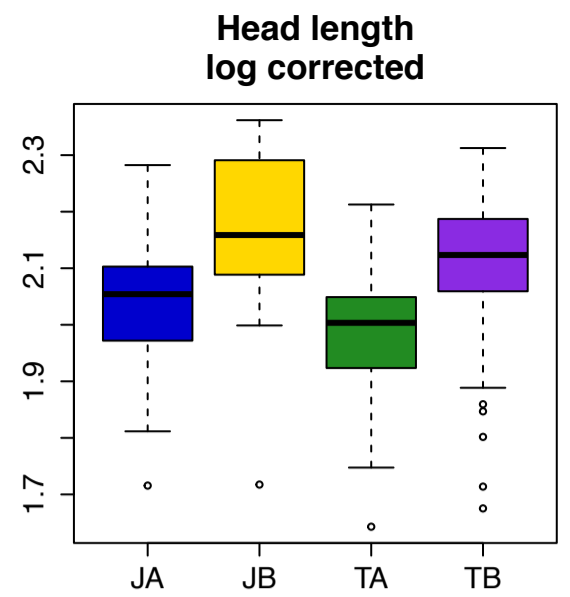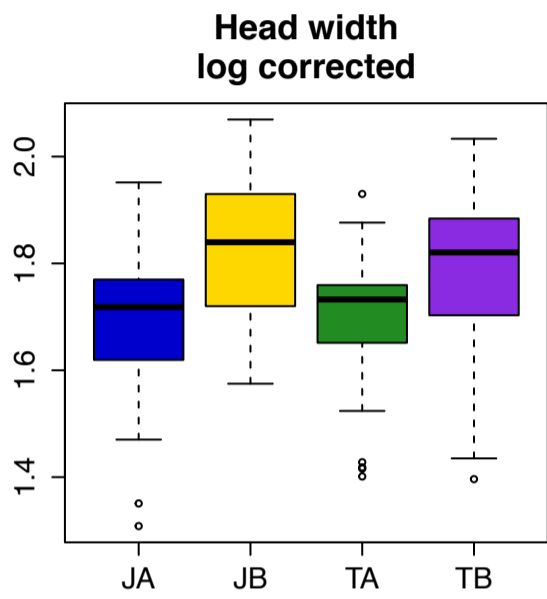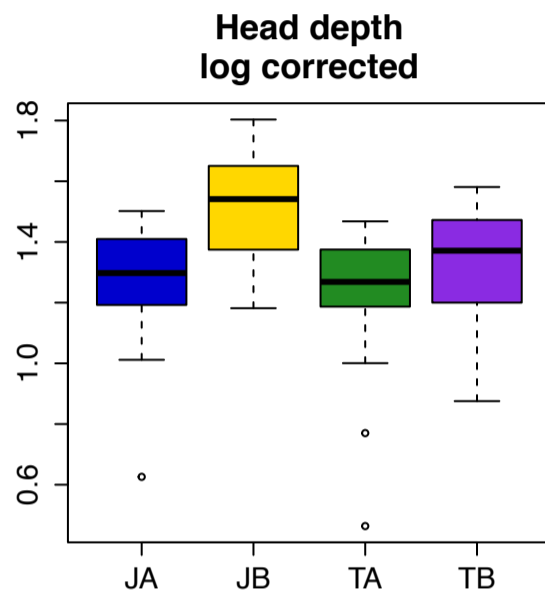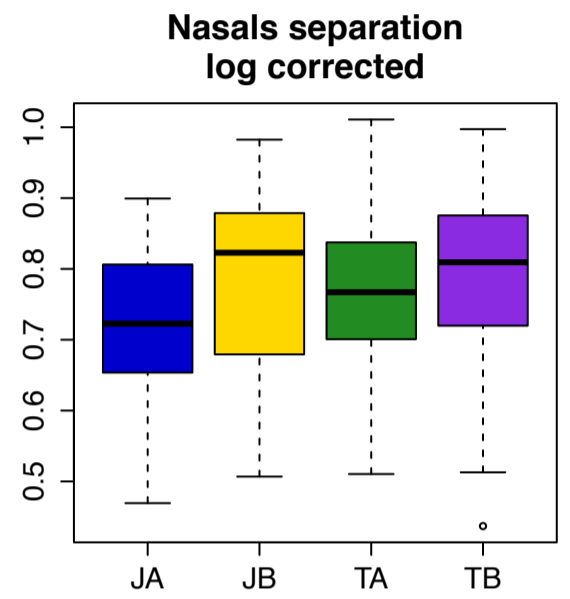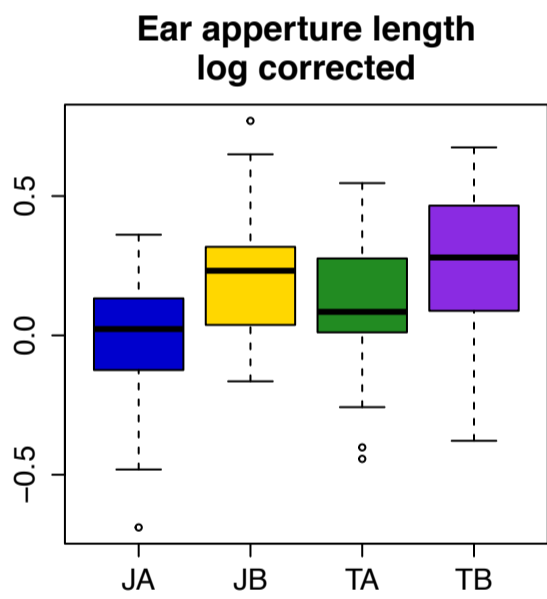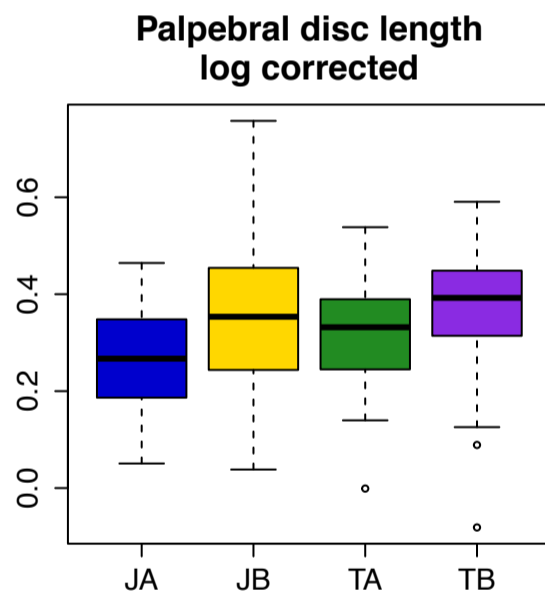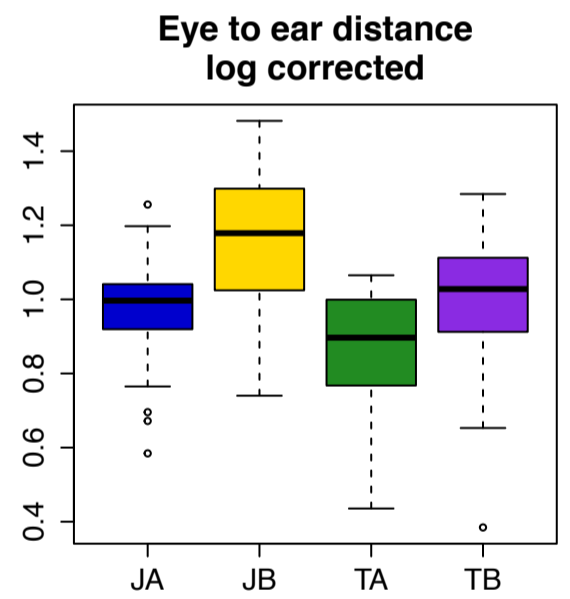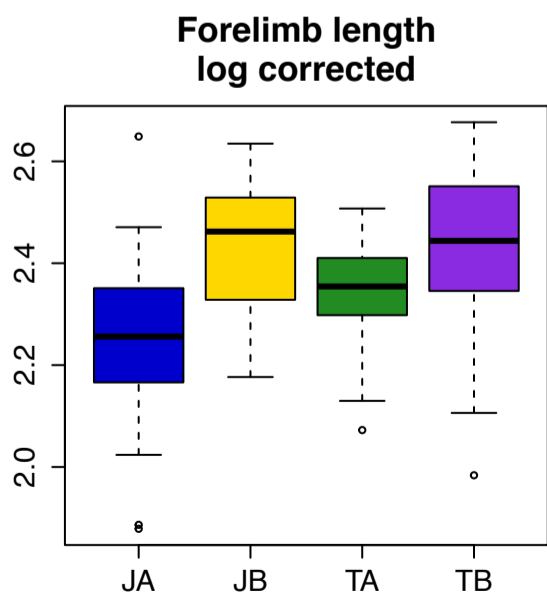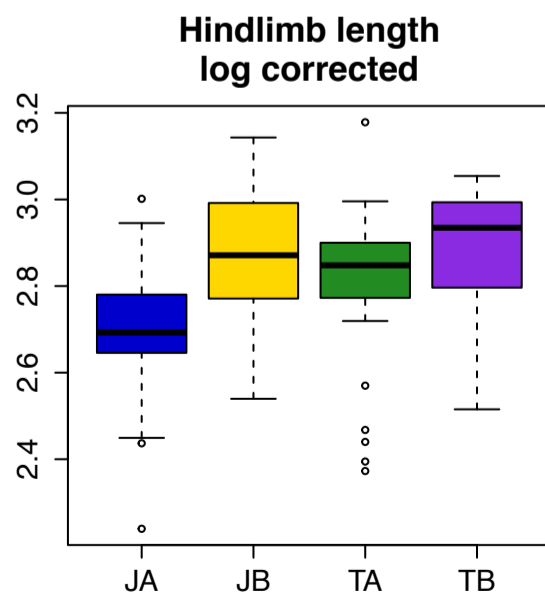

**Supplemental Figure S4** – Box plots for all log transformed variables.  
 JA – Johnstonei A, JB – Johnstonei B, TA – Triacantha A,  
 TB – Triacantha B.
