# Supplementary material for: Validation and description of two new north-western Australian Rainbow skinks with multispecies coalescent methods and morphology
Source: PubMed Central journal article supplement (PMC5580384; doi:10.7717/peerj.3724), 2017-08-29
Supplement: peerj-05-3724-s012.pdf [file peerj-05-3724-s012.pdf]

**Axilla to groin length  
log size corrected**

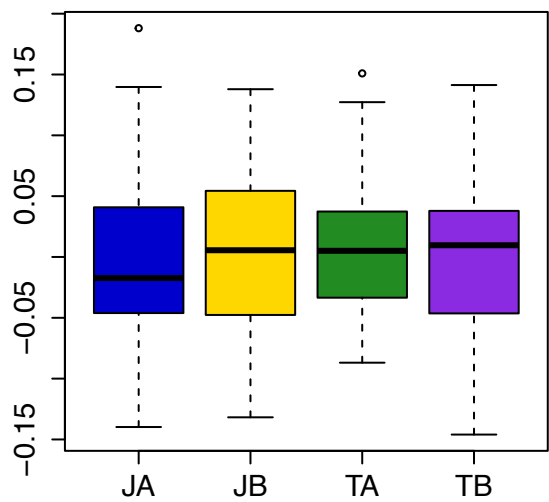

**Head length  
log size corrected**

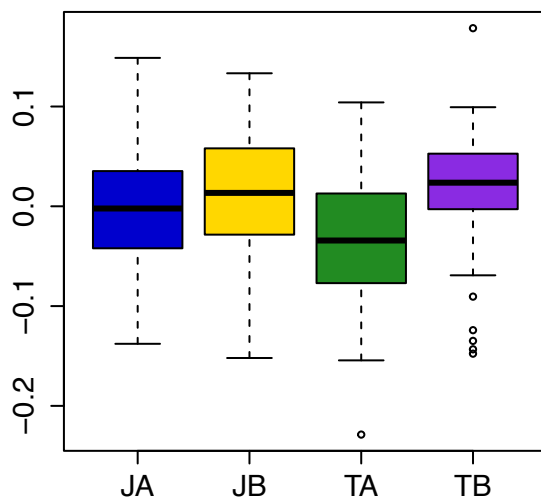

**Head width  
log size corrected**

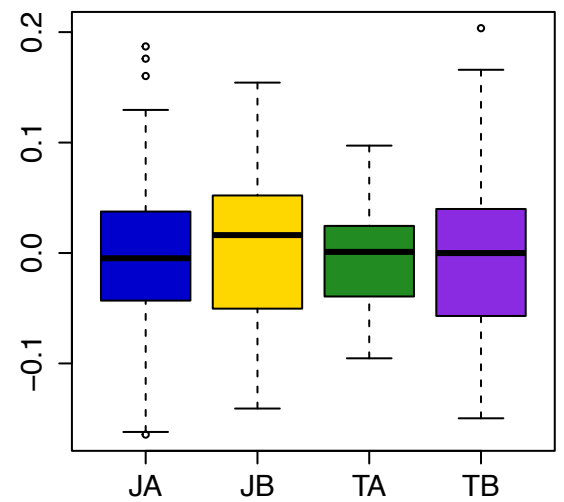

**Head depth  
log size corrected**

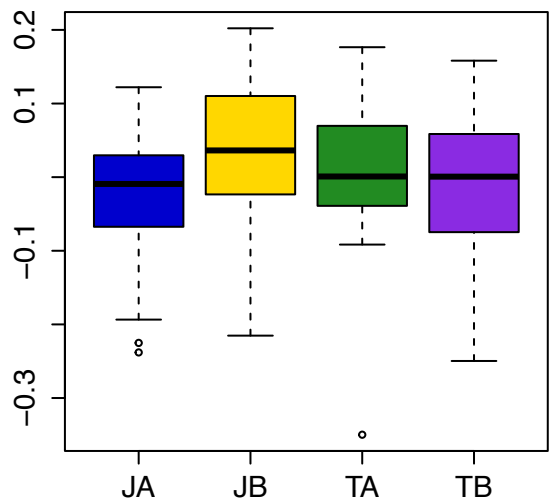

**Nasals separation  
log size corrected**

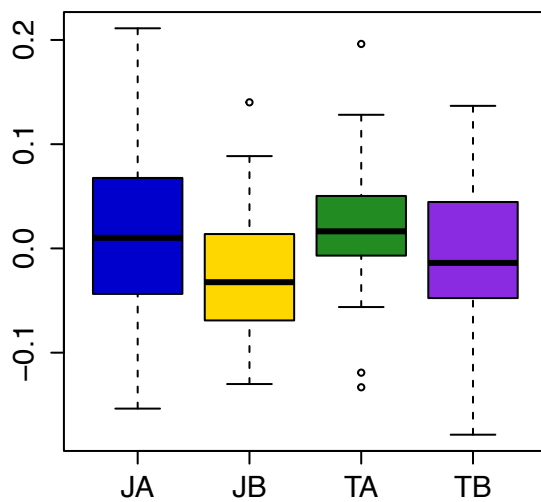

**Ear aperture length  
log size corrected**

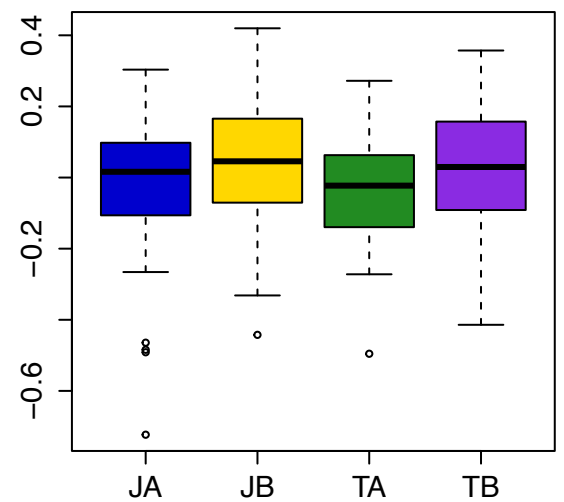

**Palpebral disc length  
log size corrected**

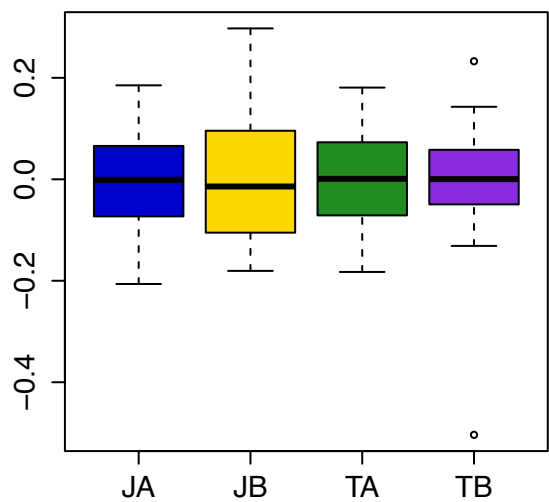

**Eye to ear distance  
log size corrected**

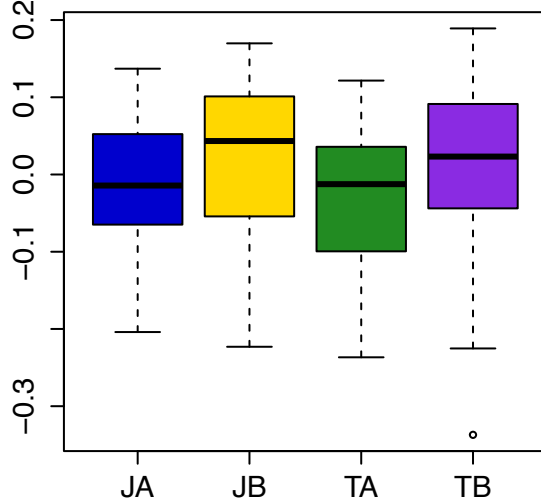

**Forelimb length  
log size corrected**

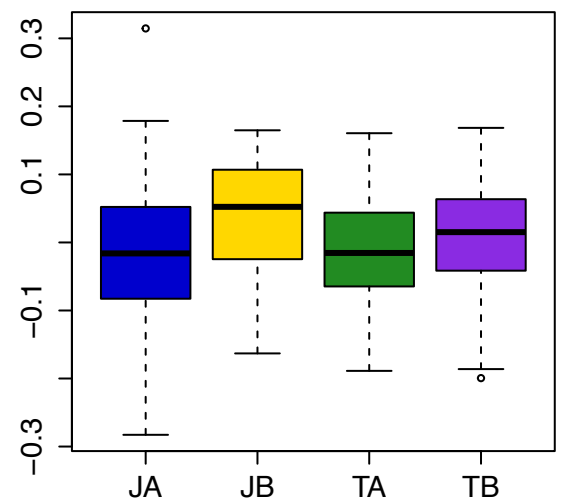

**Hindlimb length  
log size corrected**

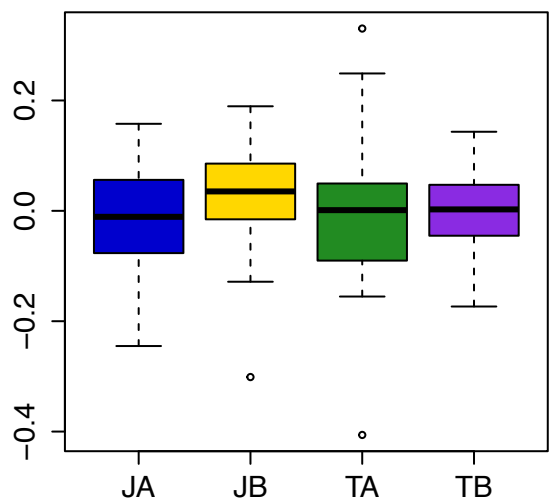

**Supplemental Figure S5 - Box plots for log and size corrected variables. JA – Johnstonei A, JB – Johnstonei B, TA – Triacantha A, TB – Triacantha B.**
