# Supplementary material for: Validation and description of two new north-western Australian Rainbow skinks with multispecies coalescent methods and morphology
Source: PubMed Central journal article supplement (PMC5580384; doi:10.7717/peerj.3724), 2017-08-29
Supplement: peerj-05-3724-s013.pdf [file peerj-05-3724-s013.pdf]

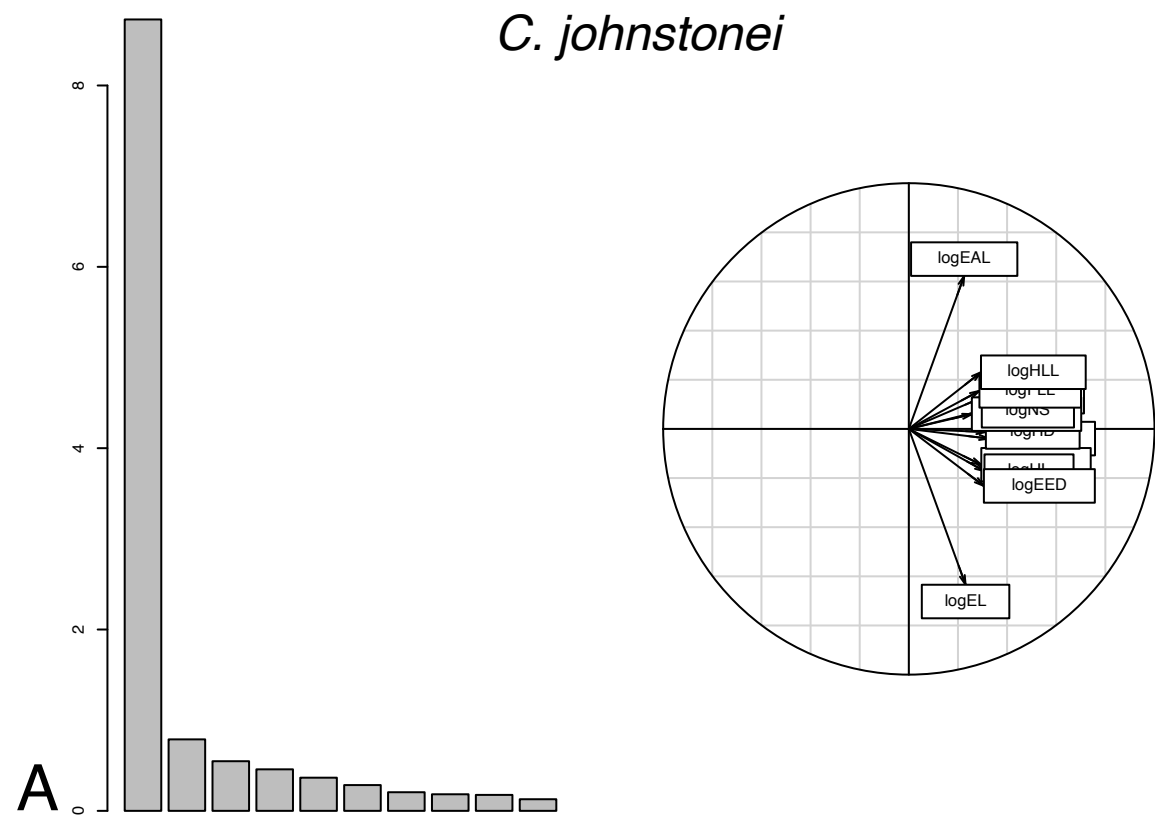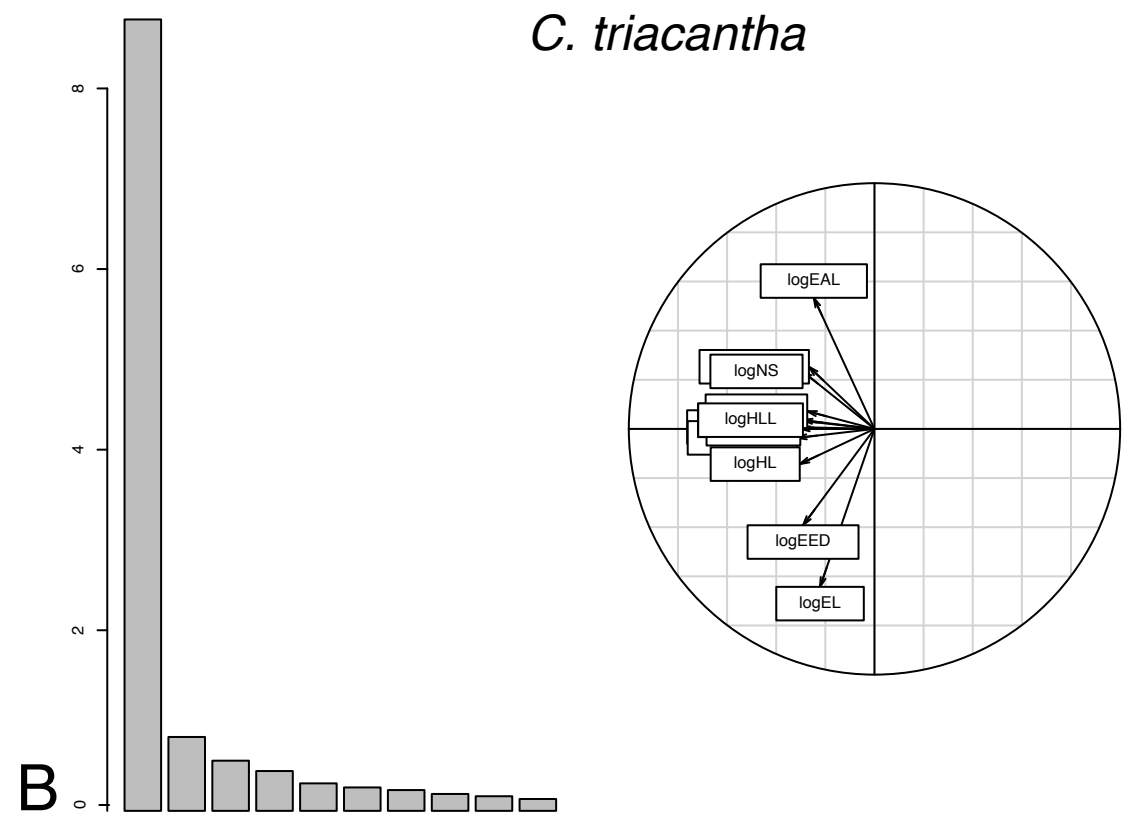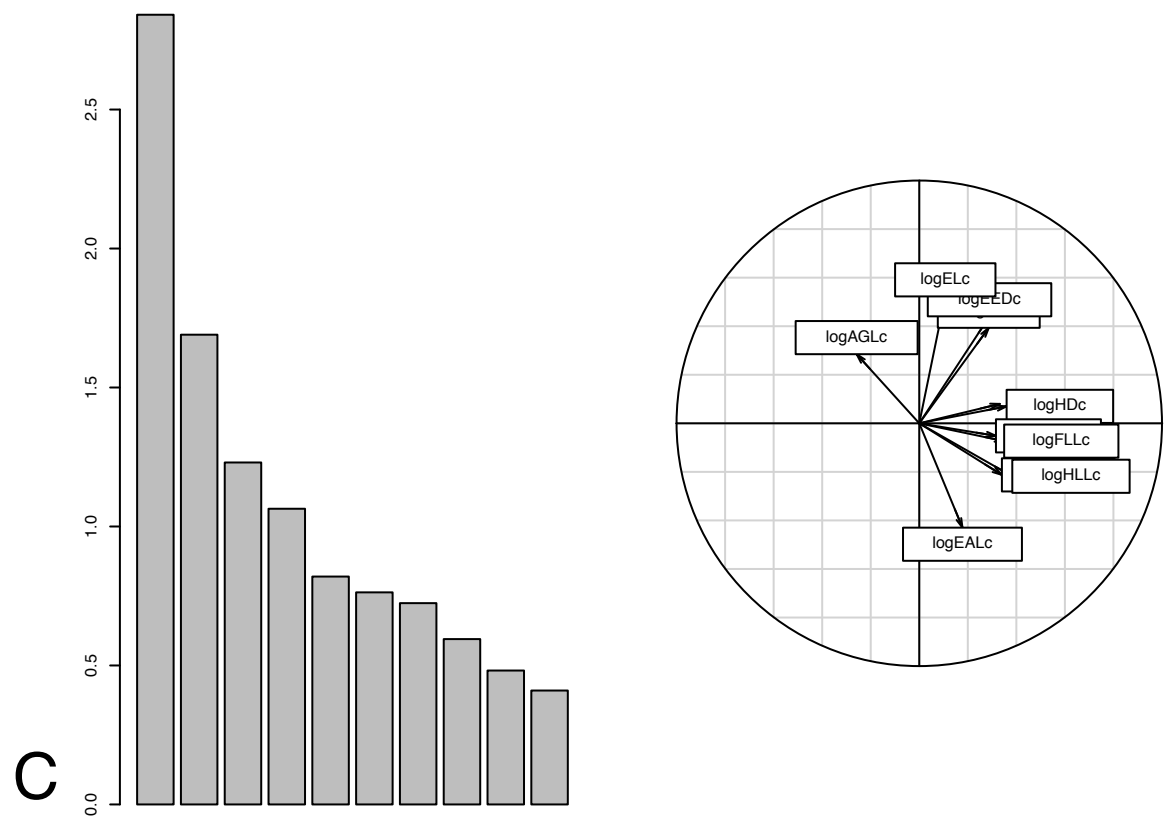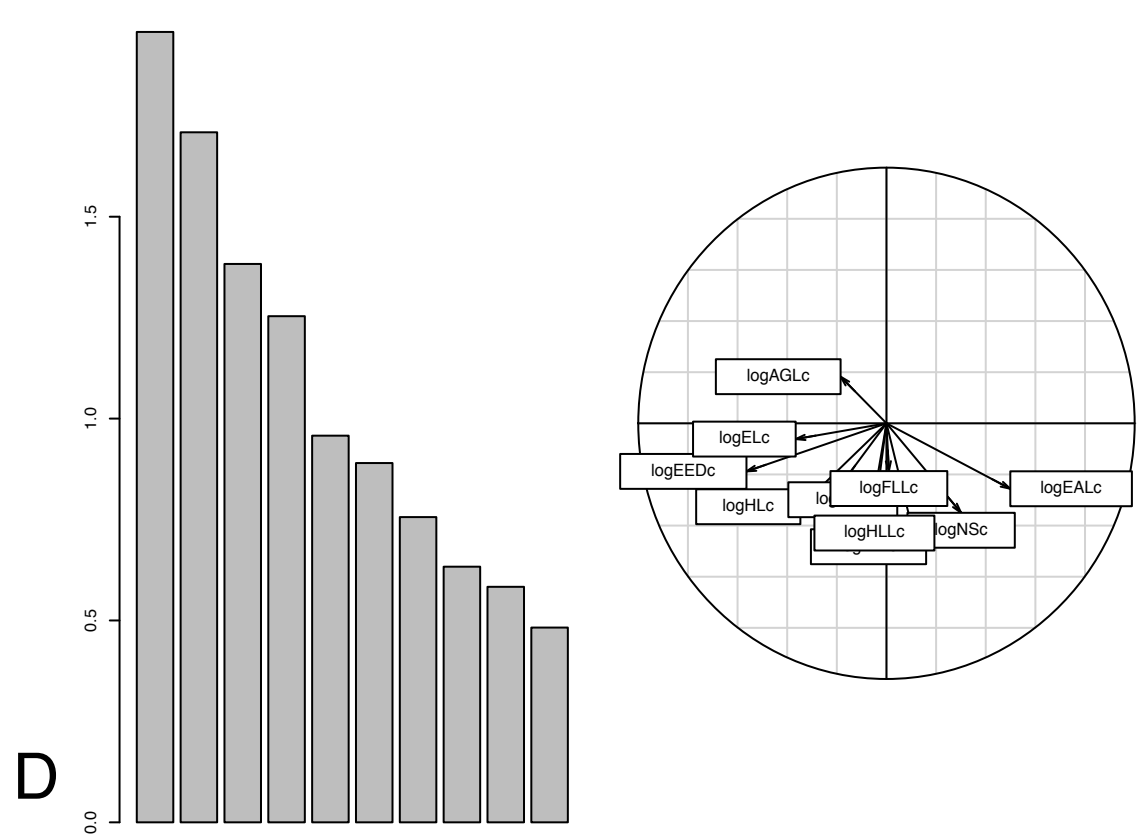

**Supplemental Figure S6** – PCA loadings and variables importance of PCA with log transformed data (A, B) and with size corrected data (C, D) for *C. johnstonei* and *C. triacantha*.
