# Supplementary material for: Validation and description of two new north-western Australian Rainbow skinks with multispecies coalescent methods and morphology
Source: PubMed Central journal article supplement (PMC5580384; doi:10.7717/peerj.3724), 2017-08-29
Supplement: peerj-05-3724-s014.pdf [file peerj-05-3724-s014.pdf]

**A**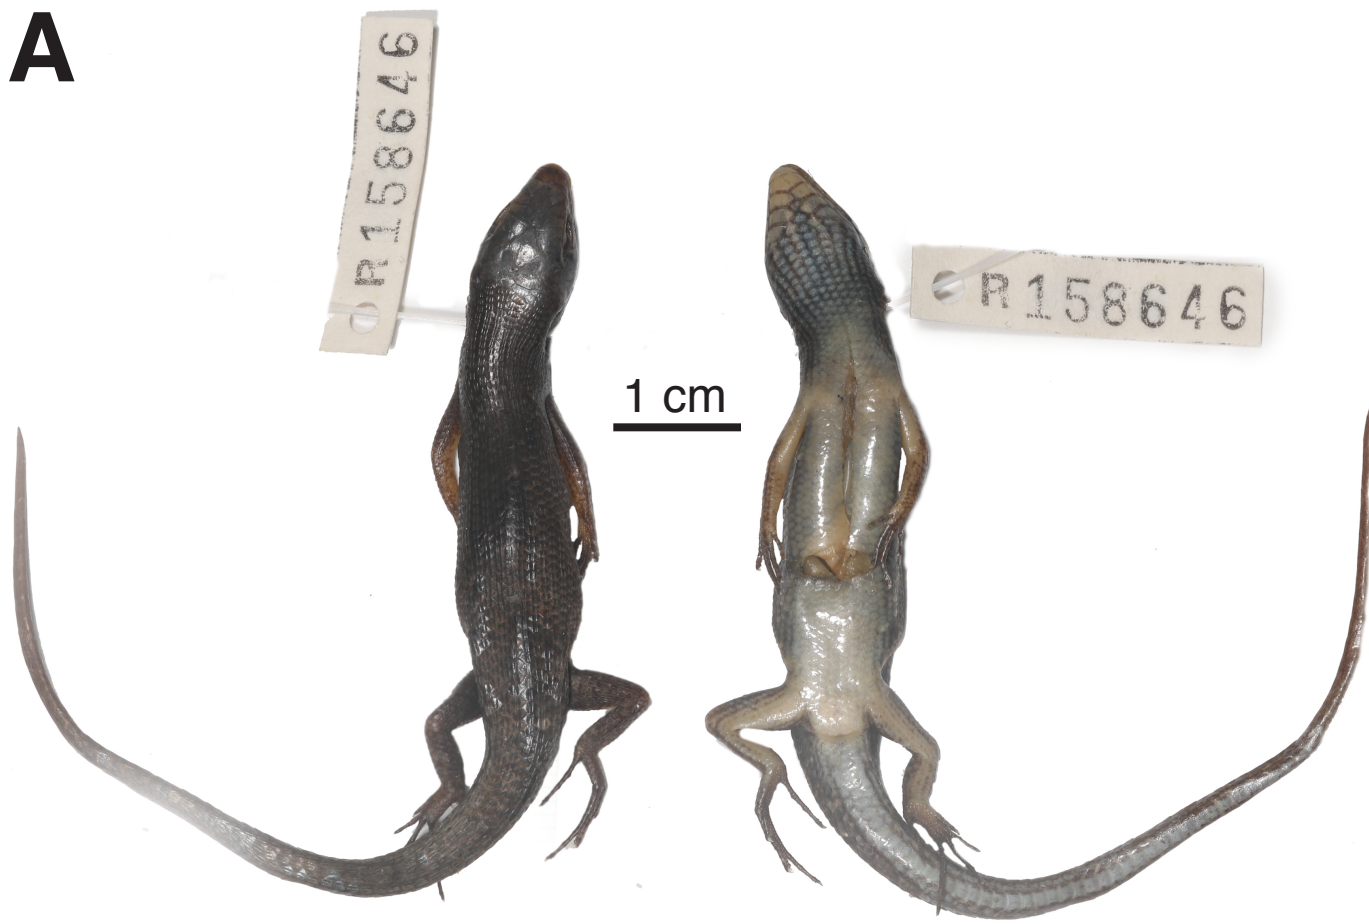**B**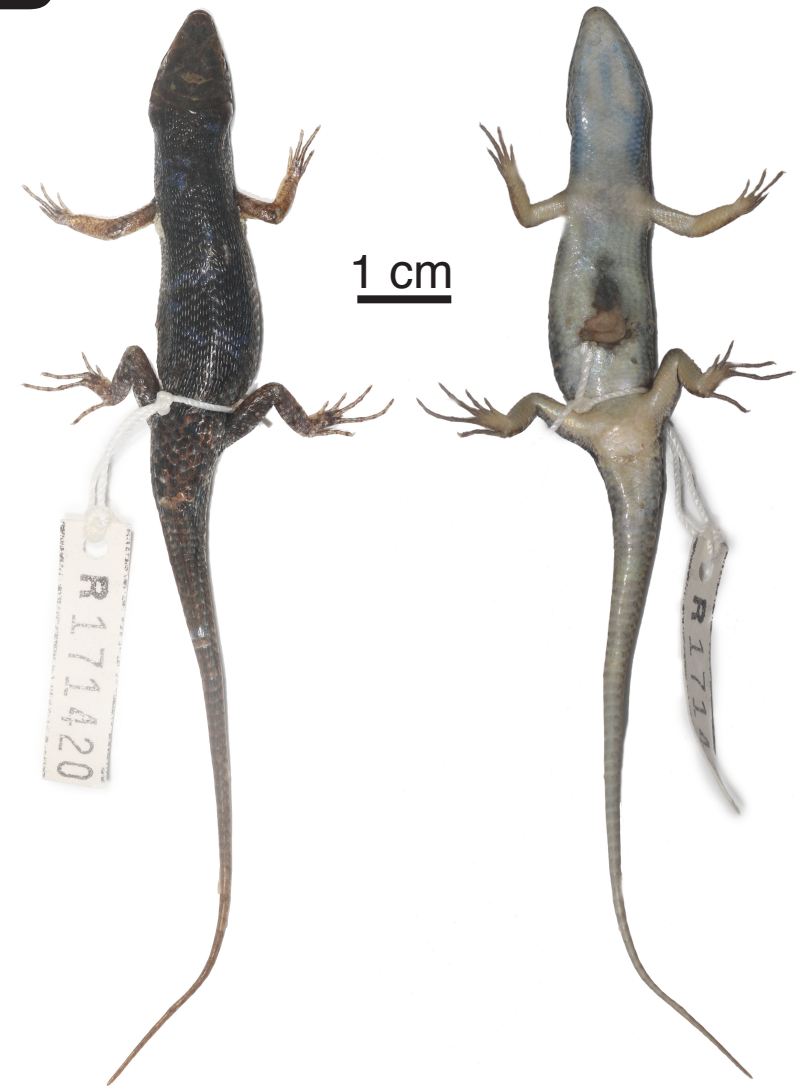

**Supplemental Figure S7** – Dorsal and ventral view of holotypes of *C. insularis* sp. nov. (A), specimen WAM R158646, and *C. isostriacantha* sp. nov. (B), specimen WAM R171420. All photos by Damien Esquerré.
