# Supplementary material for: Validation and description of two new north-western Australian Rainbow skinks with multispecies coalescent methods and morphology
Source: PubMed Central journal article supplement (PMC5580384; doi:10.7717/peerj.3724), 2017-08-29
Supplement: peerj-05-3724-s015.pdf [file peerj-05-3724-s015.pdf]

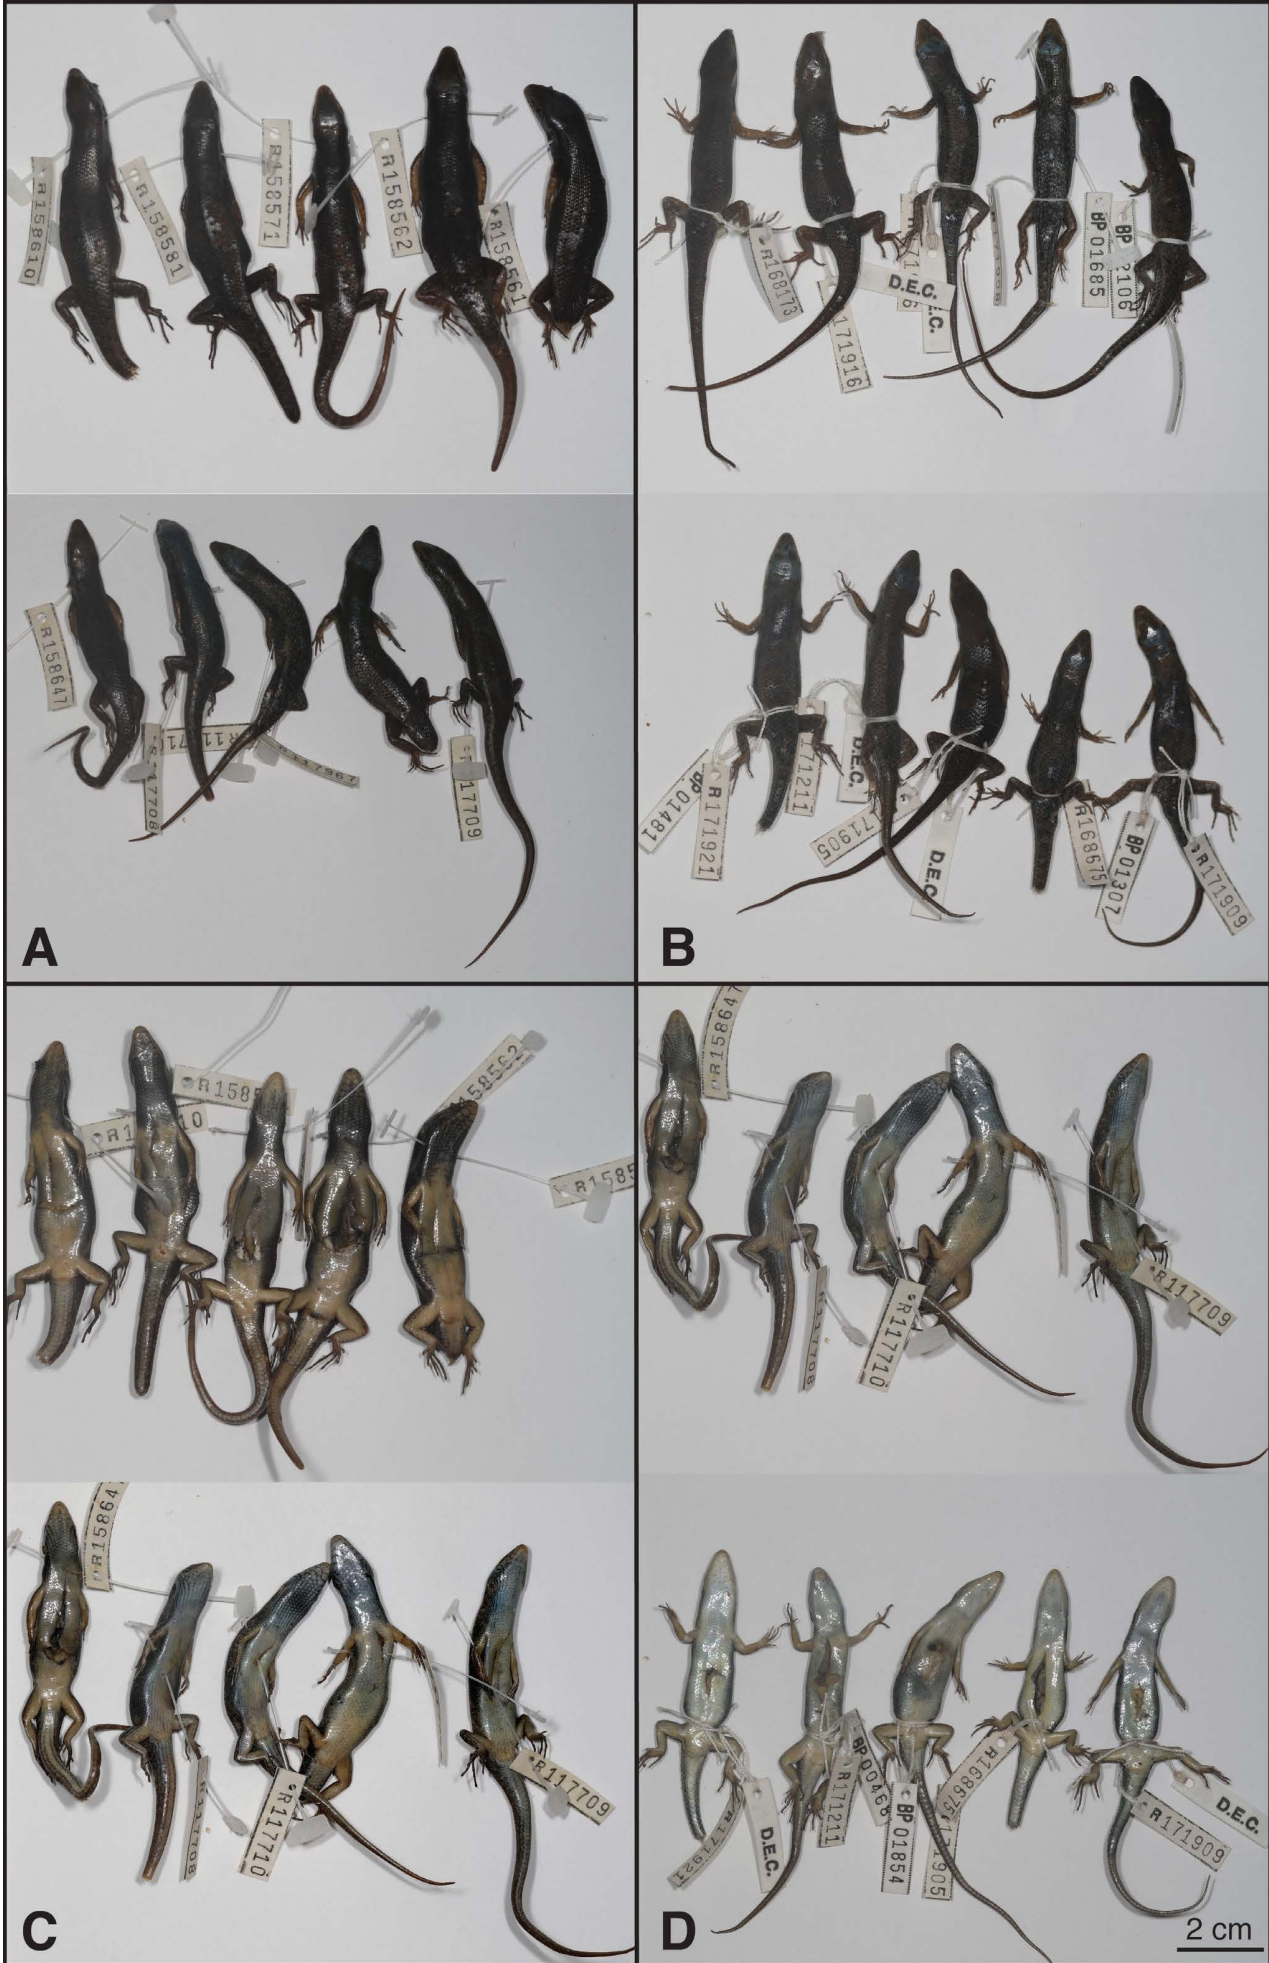

Supplemental Figure S8 – Dorsal and ventral paratype photos for *C. insularis* sp. nov. (A, C) and for *C. isostriacantha* sp. nov. (B, D). All photos by Damien Esquerré.
