# Supplementary material for: Validation and description of two new north-western Australian Rainbow skinks with multispecies coalescent methods and morphology
Source: PubMed Central journal article supplement (PMC5580384; doi:10.7717/peerj.3724), 2017-08-29
Supplement: peerj-05-3724-s016.pdf [file peerj-05-3724-s016.pdf]

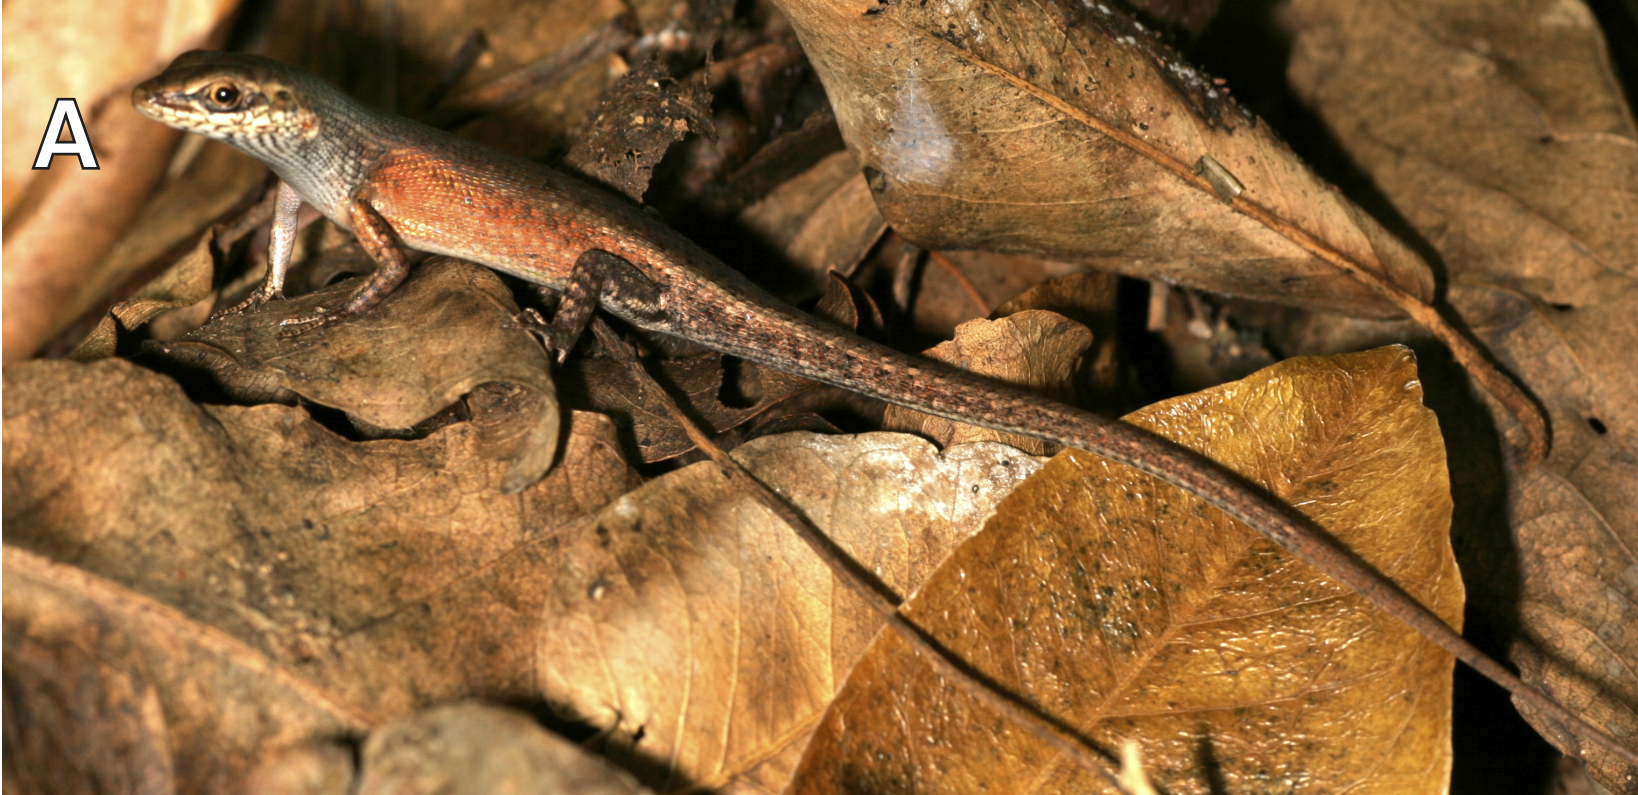

A

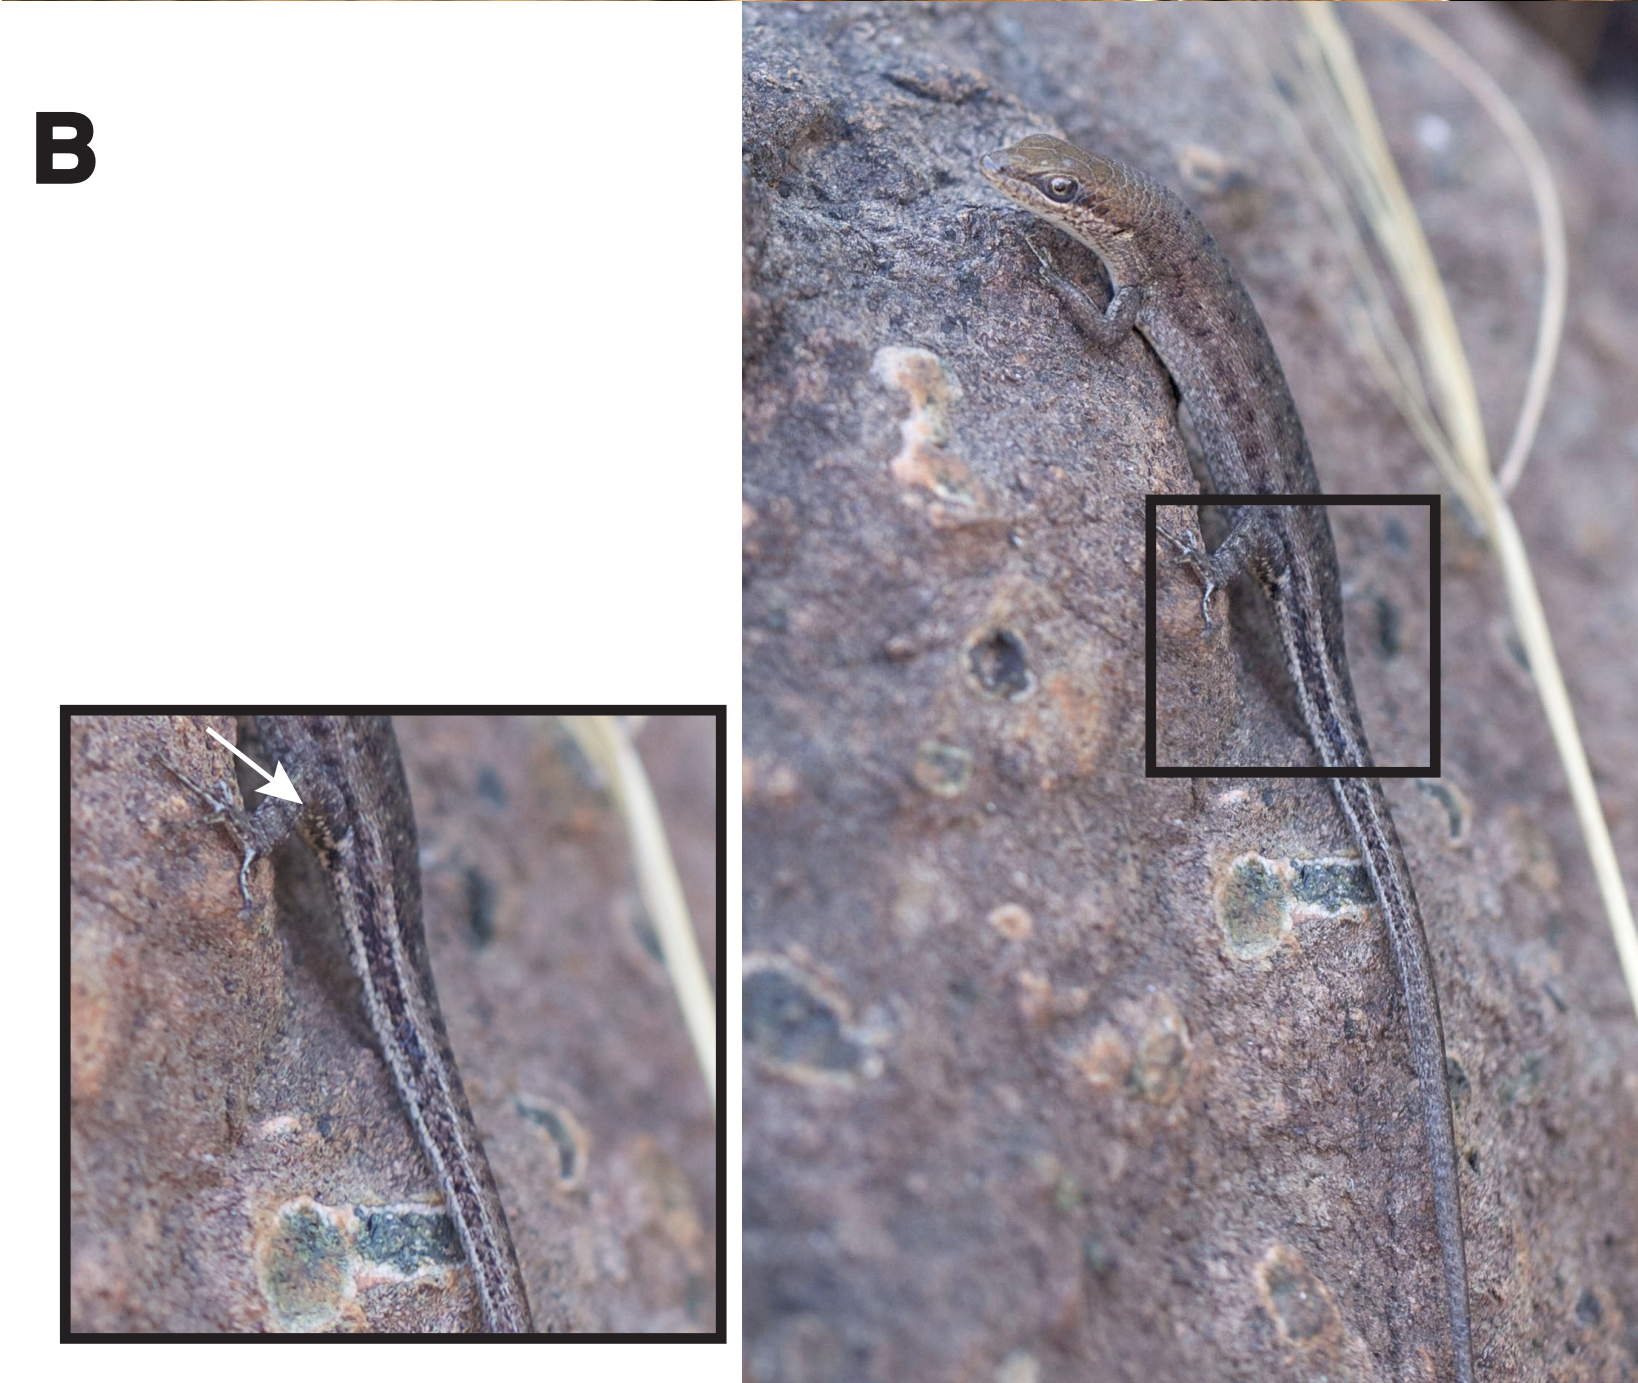

B

Supplemental Figure S9 – Photos with live animals showing breeding colours of *C. insularis* sp. nov. (A, photo by Russell Barrett) and a potential diagnostic trait in *C. isostriacantha* sp. nov. (B, photo by Mark Allen). The white arrow points to the potential white line trait that distinguish this species from *C. triacantha*.
